# Supplementary material for: Comparative transcriptomes of three different skin sites for the Asiatic toad (Bufo gargarizans)
Source: PeerJ journal article supplement (doi:10.7717/peerj.12993), 2022-02-22

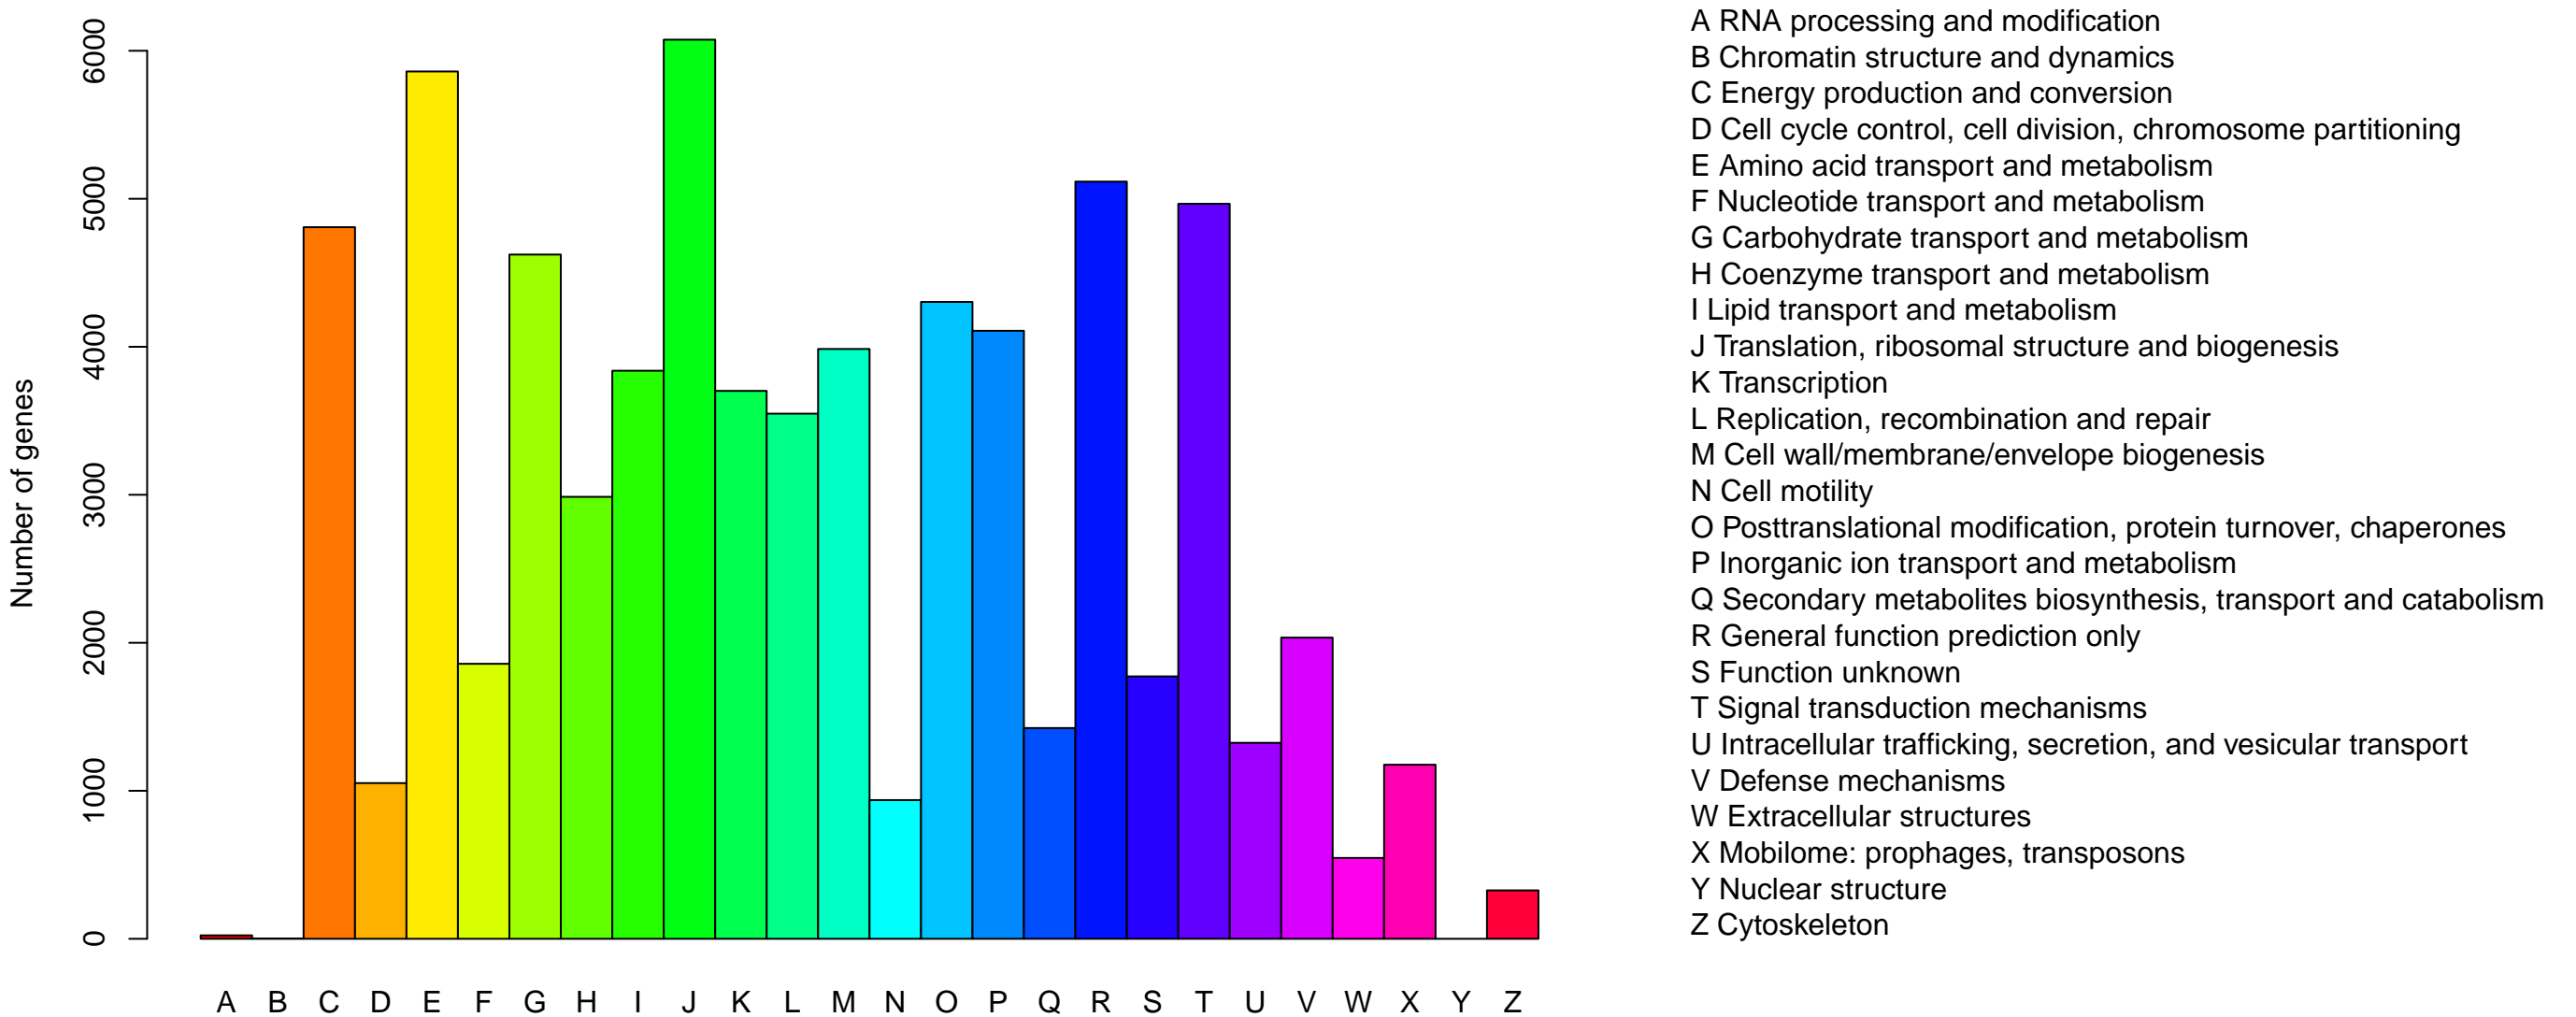

Supplement: Figure_S2.pdf [file Figure_S2.pdf]
